# Supplementary material for: A novel pre-fusion conformation-specific neutralizing epitope on the respiratory syncytial virus fusion protein
Source: PubMed Central journal article supplement (PMC5463187; doi:10.1038/nmicrobiol.2016.271), 2017-01-30
Supplement: NIHMS862890-supplement-Supplemental.pdf [file NIHMS862890-supplement-Supplemental.pdf]

In the format provided by the authors and unedited.

# **A novel pre-fusion conformation-specific neutralizing epitope on the respiratory syncytial virus fusion protein**

**Jarrold J. Mousa, Nurgun Kose, Pranathi Matta, Pavlo Gilchuk and James E. Crowe Jr**

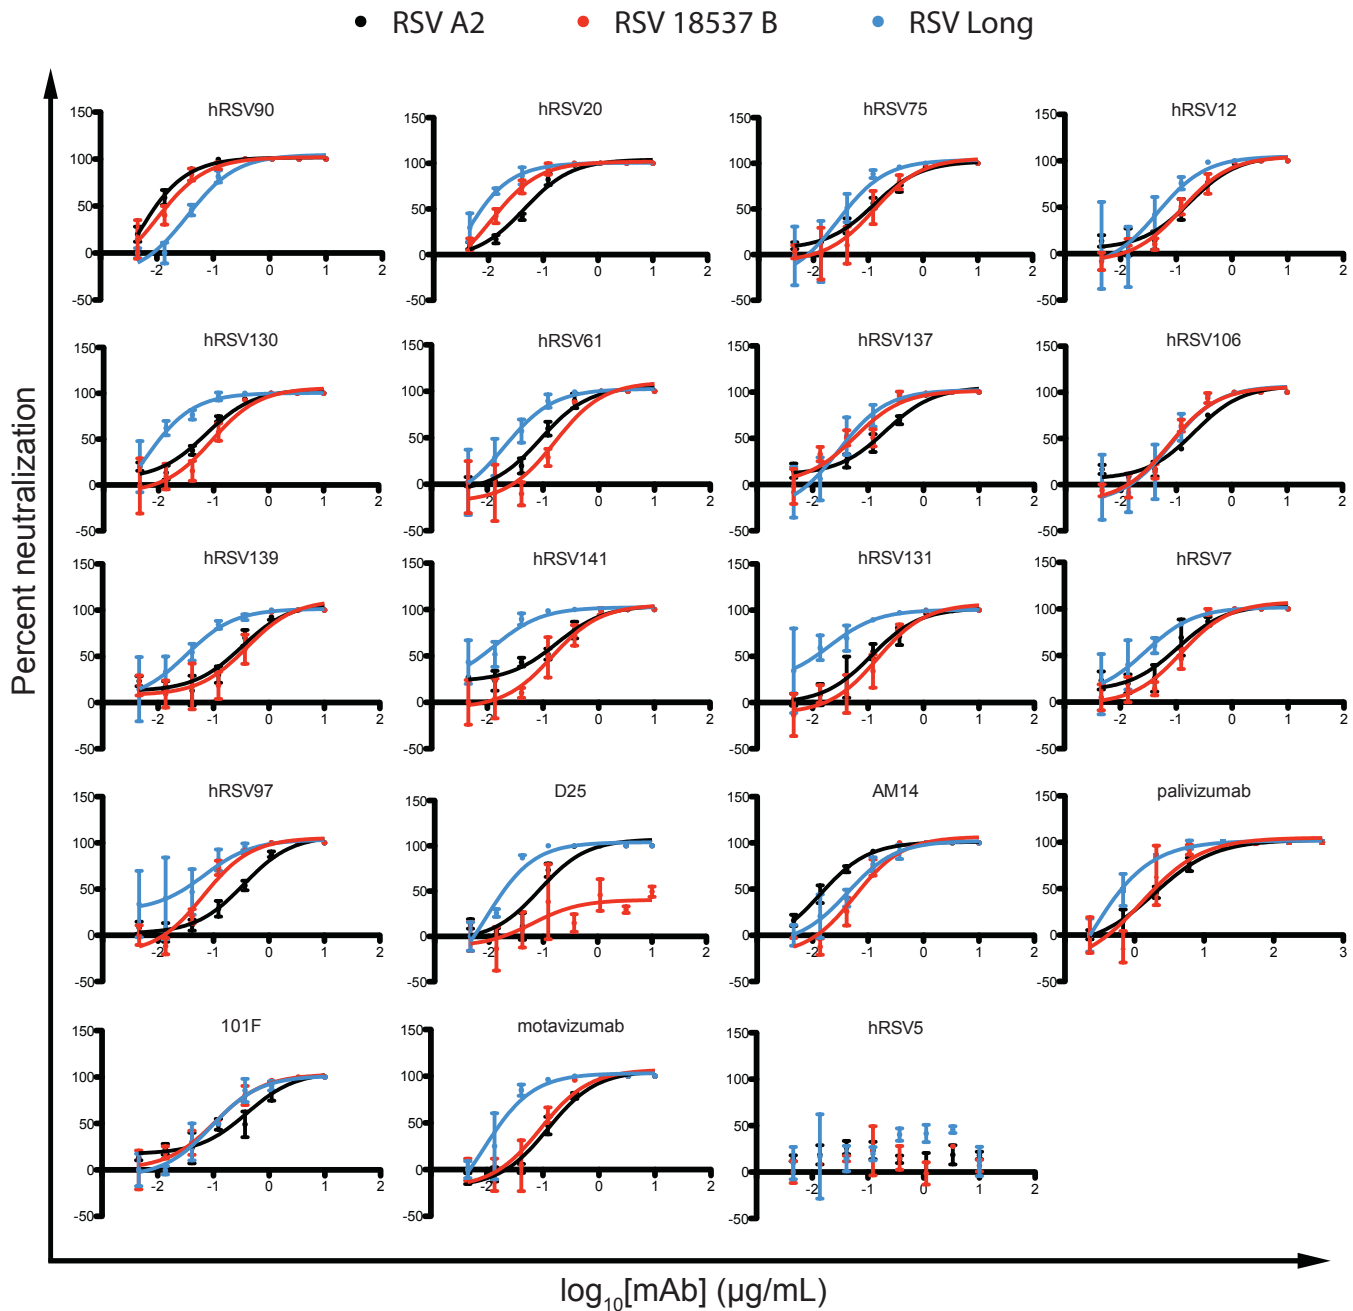

**Supplementary Figure 1. Neutralization curves for the newly isolated RSV F-specific mAbs.**  $\text{IC}_{50}$  values are displayed in Table 1. Error bars represent the standard deviation of three technical replicates from one of at least two independent experiments. A non-neutralizing RSV F specific mAb, hRSV5, was used as a negative control. MABs D25, 101F, AM14, motavizumab, and palivizumab were included as positive controls.

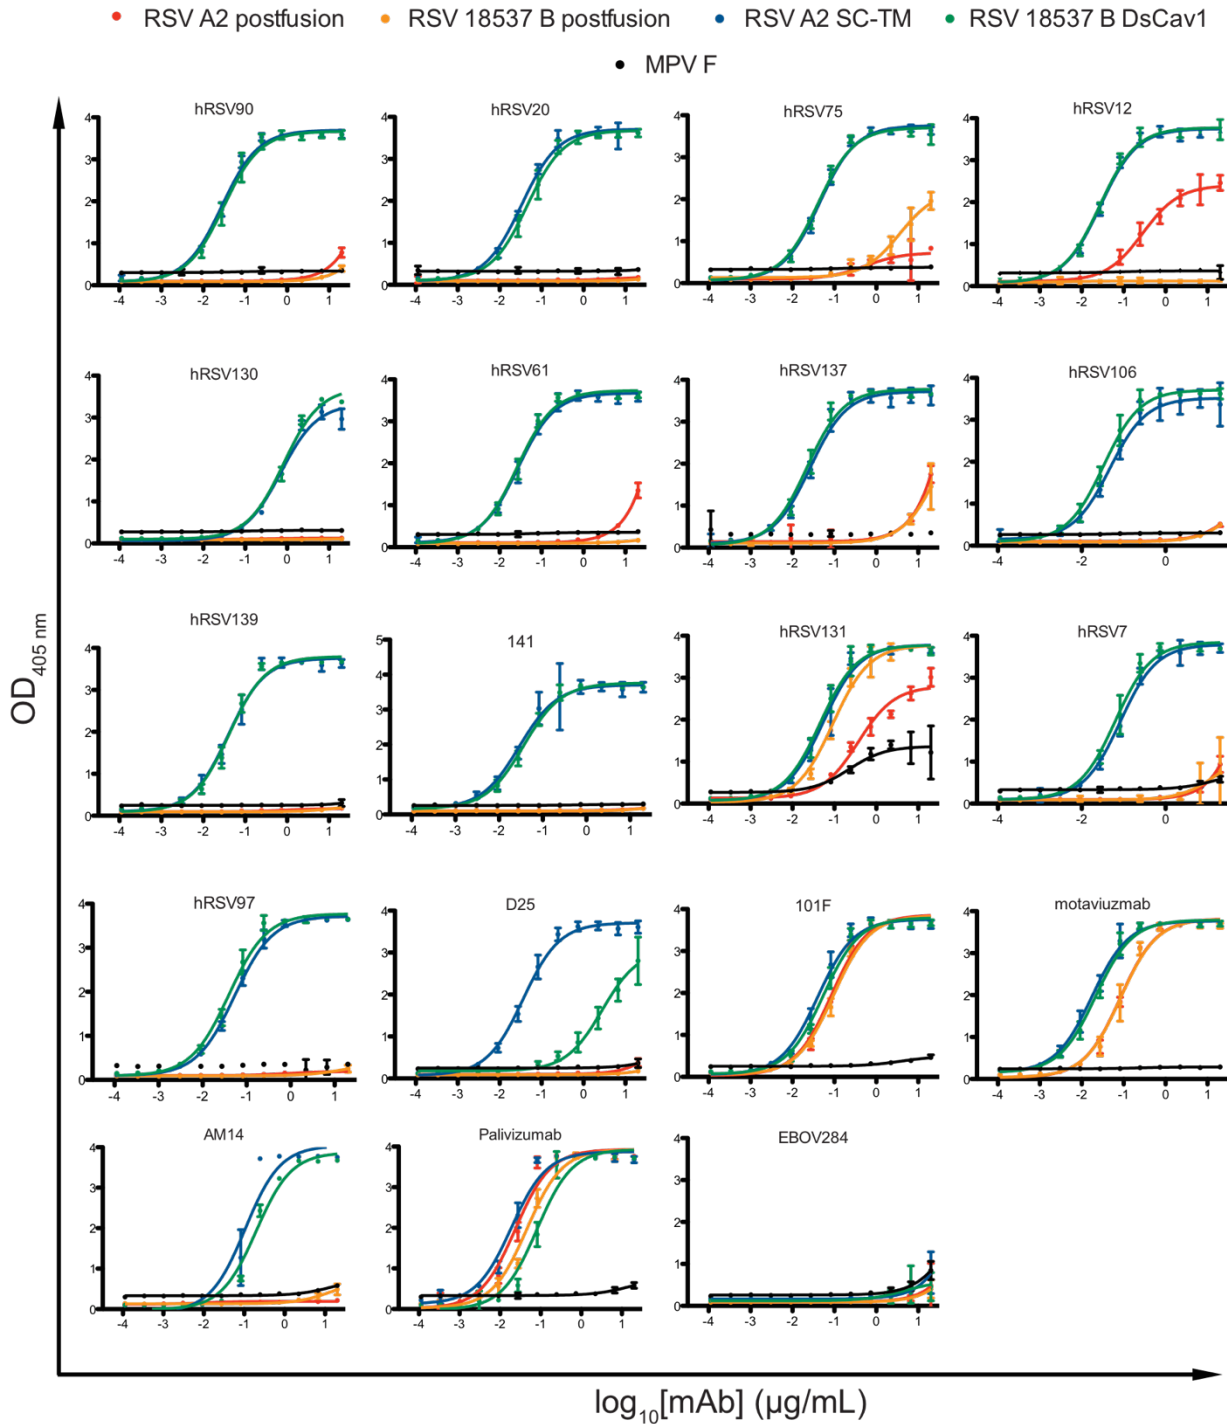

**Supplementary Figure 2. ELISA binding curves for the newly isolated mAbs and positive controls to RSV F protein strain and construct variants.** The metapneumovirus F protein was used as a negative binding control. An Ebola-virus specific mAb EBOV284 was used as a negative mAb control. Error bars indicate 95% confidence intervals of four technical replicates from one of at least two independent experiments. EC<sub>50</sub> values for these curves are displayed in Table 1.

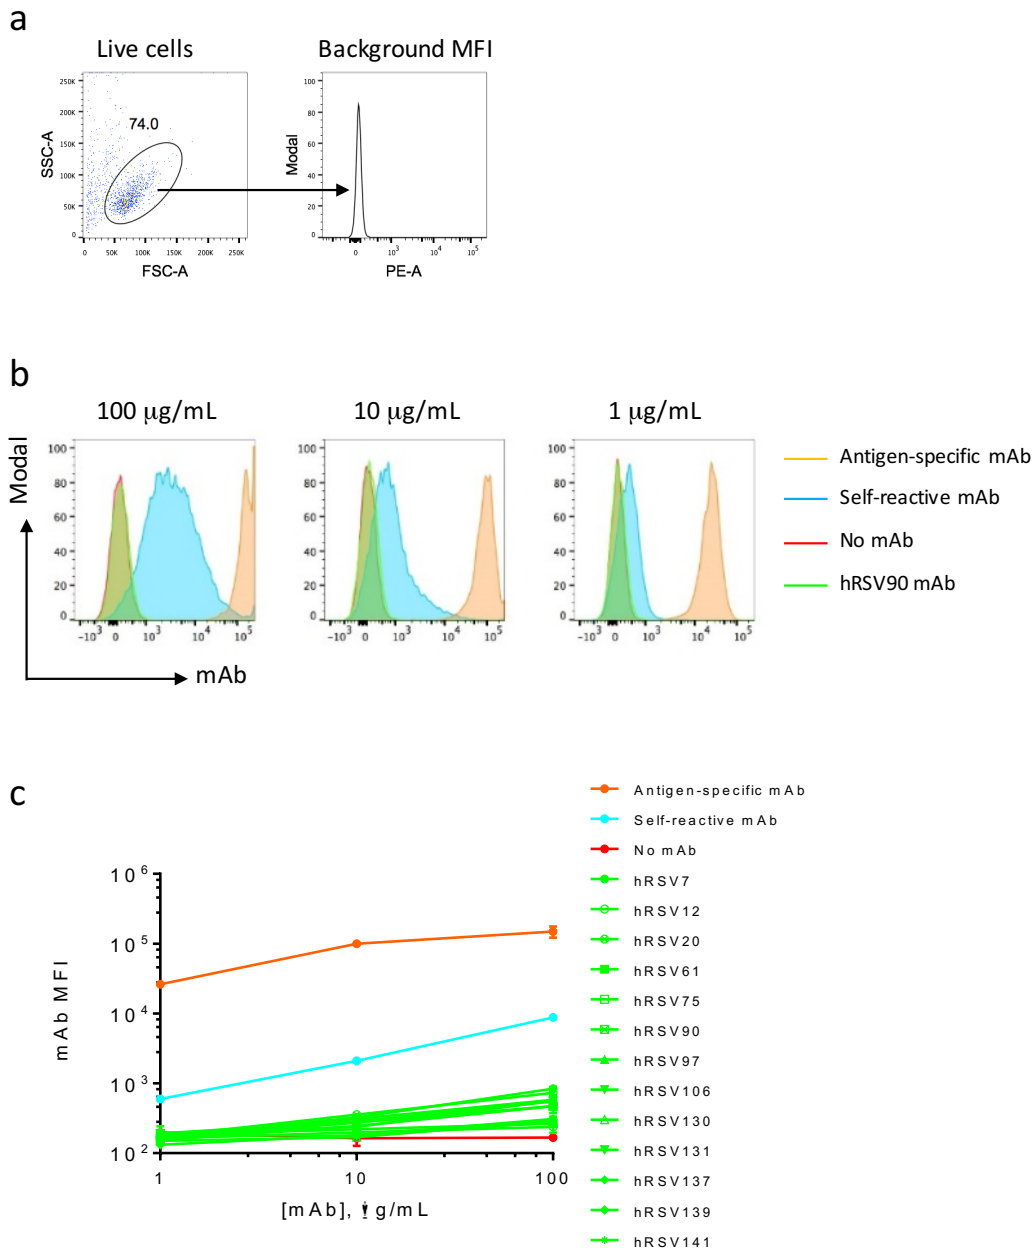

**Supplementary Figure 3. Assessing self-reactivity of hRSV mAbs by flow cytometry.** Jurkat cell line was stained with individual mAbs followed by incubation with secondary phycoerythrin (PE)-conjugated Ab and flow cytometric analysis. (a) Gating strategy for measuring binding of mAb to Jurkat cells. (b) Representative flow cytometric histograms showing dose-dependent binding of antigen-specific, self-reactive, or hRSV90 mAbs to Jurkat cells. Binding of BDBV289 Ebola virus GP-specific mAb to transfected Jurkat cells that express Ebola virus GP on their surface served as positive control for antigen-specific mAb (orange histogram); a mAb with known self-reactivity (BDBV223) served as a control for self-reactivity (light blue histogram); Jurkat stained with secondary detection PE-conjugated Ab only served as a control for assay background (red histogram). (c) Dose-dependent binding of hRSV mAbs to Jurkat cells measured as mean fluorescence intensity (MFI). Error bars represent the SD of two technical replicates.

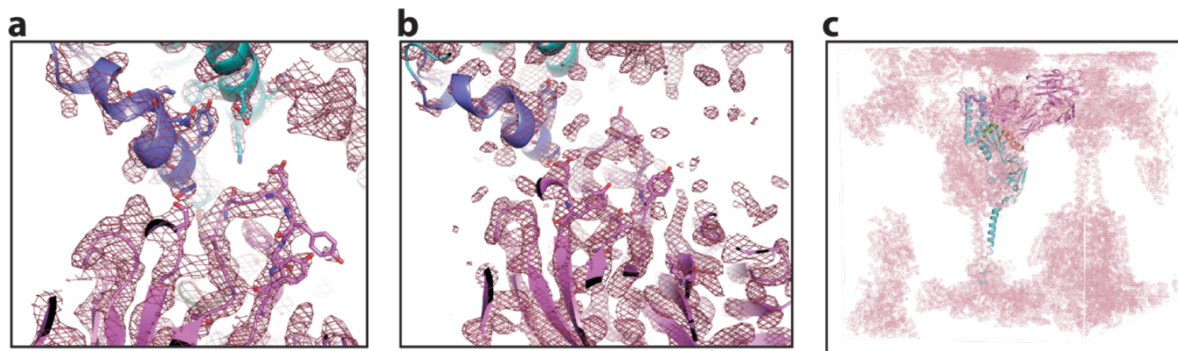

**Supplementary Figure 4. Density maps for the hRSV90-RSV F A2 SC-TM interface.** (a) 2F<sub>o</sub>-2F<sub>c</sub> density map. (b) Simulated annealing composite omit density map of the same interface. (c) 2F<sub>o</sub>-2F<sub>c</sub> Density map of the entire structure showing density for the foldon trimerization domain.

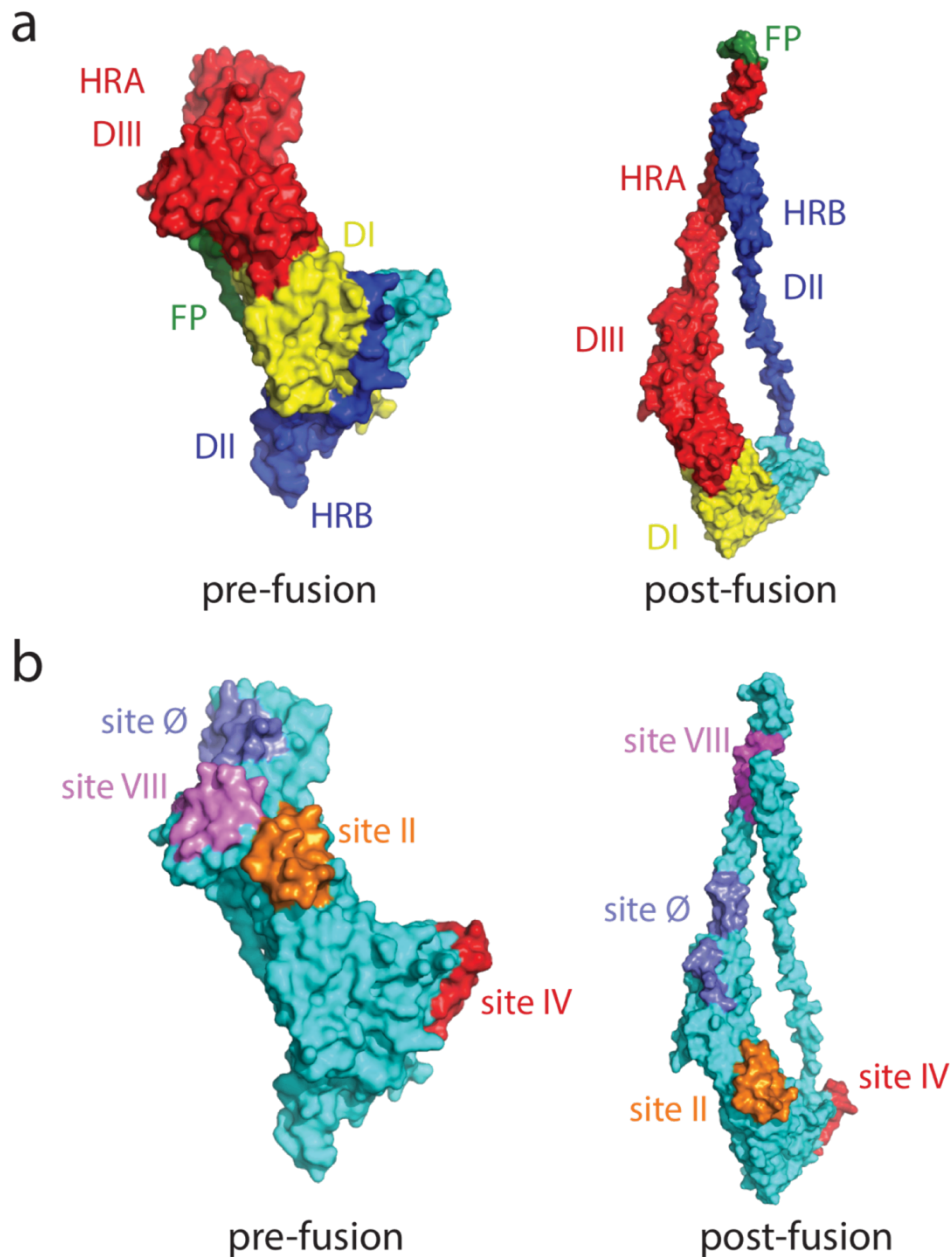

**Supplementary Figure 5. Structural and antigenic regions of the RSV F protein.** (a) Structural regions of the RSV F protein are shown with corresponding labels in both pre-fusion and post-fusion structures. HRA is heptad repeat A (red as part of DIII), HRB is heptad repeat B (blue as part of DII), FP is fusion peptide (green), and DI is shown in yellow. (b) Antigenic regions in the pre-fusion and post-fusion RSV F structures are colored. Site IV is red, site II is orange, site Ø is blue, and site VIII is magenta. Residues comprising antigenic sites Ø and VIII are rearranged in the post-fusion conformation, resulting in loss of mAb binding. Site VIII becomes part of the six-helix bundle of the post-fusion RSV F protein.

a

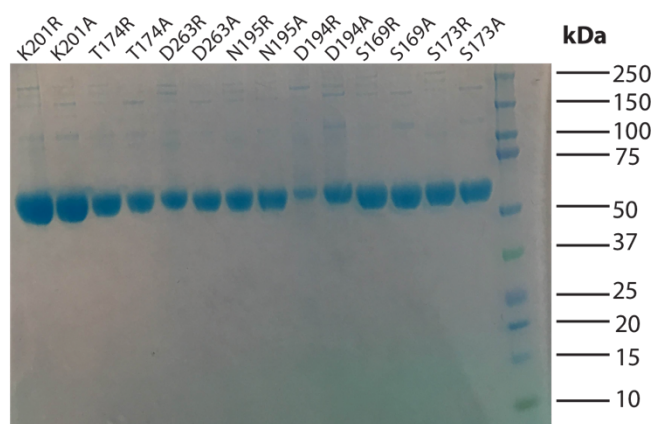

Coomassie-stained SDS-PAGE

b

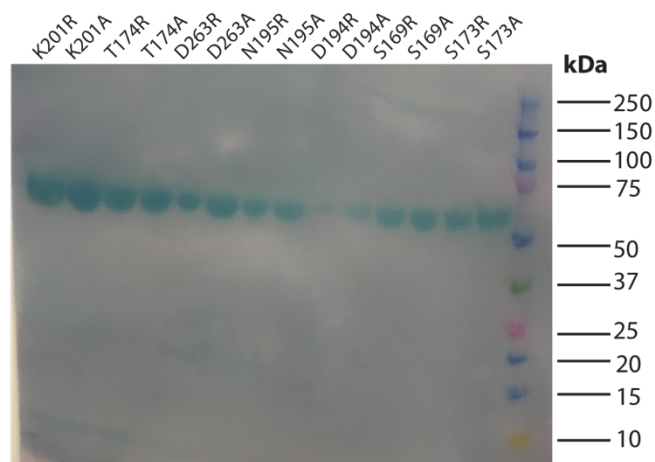

Anti-polyhistidine-alkaline phosphatase antibody  
BM purple chromogenic substrate

**Supplementary Figure 6. RSV F SC-TM mutants.** (a) A Coomassie-stained SDS-PAGE is displayed with bands displayed for each purified mutant protein. (b) A corresponding western blot is shown using a monoclonal anti-polyhistidine-alkaline phosphatase antibody with BM purple chromogenic substrate to visualize the RSV F mutants directly on the PVDF membrane. Purifications, SDS-PAGE, and western blot were conducted once.

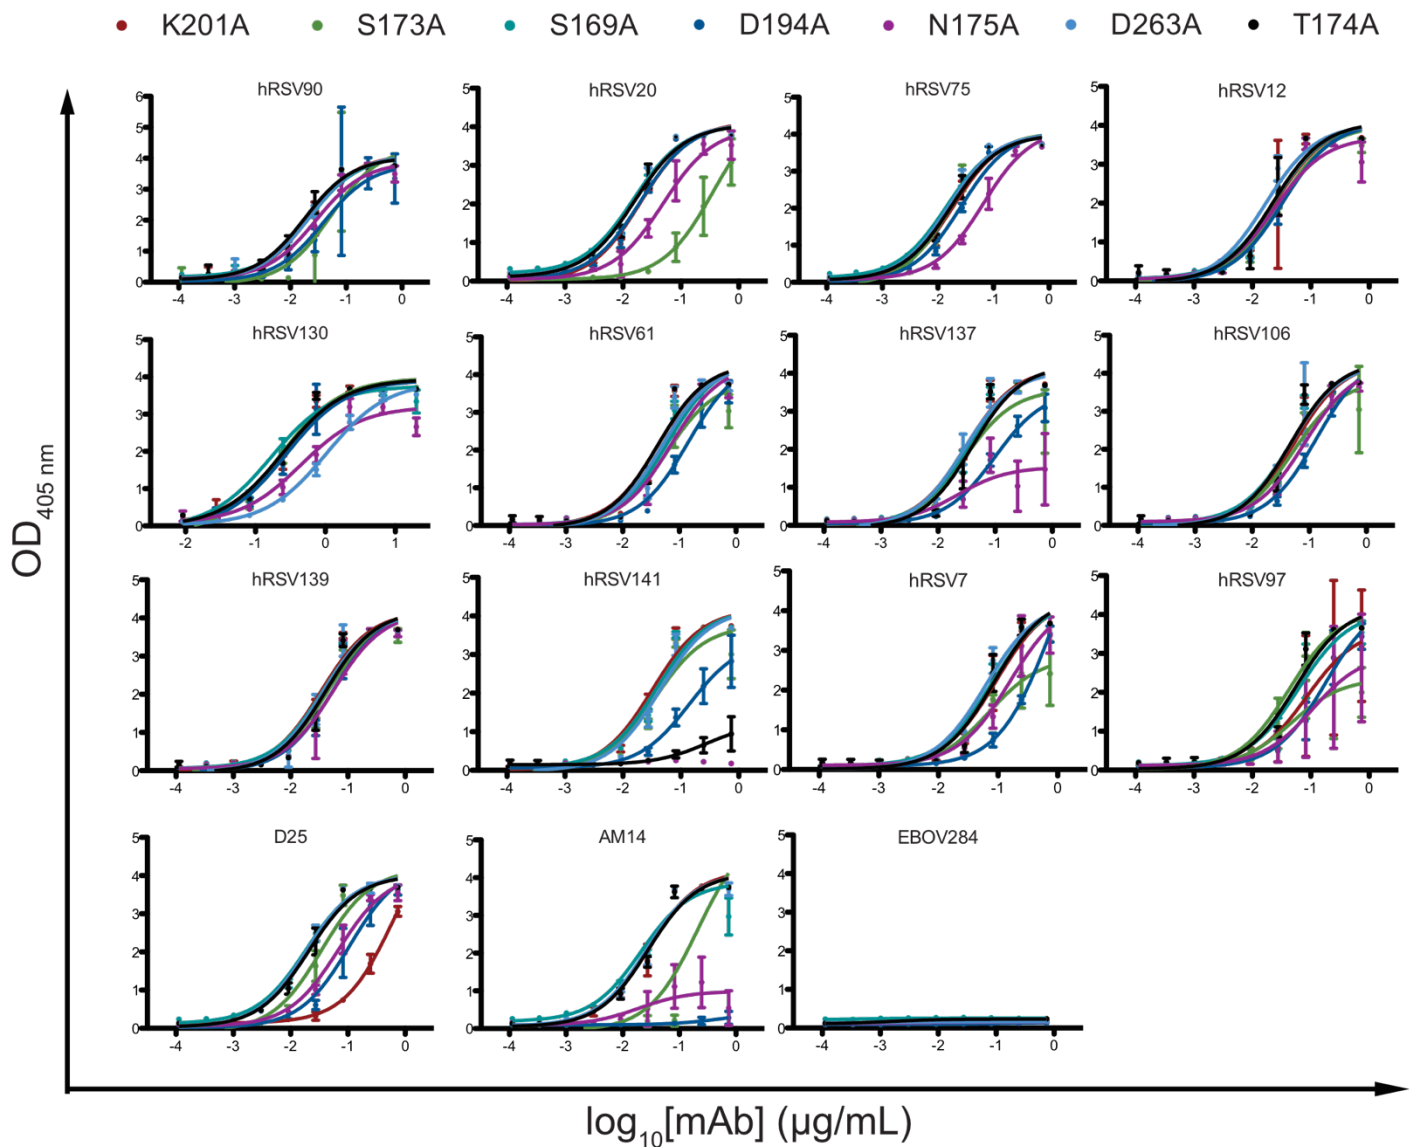

**Supplementary Figure 7. ELISA binding curves for RSV F SC-TM alanine mutations at the hRSV90 binding site.** Error bars indicate 95% confidence intervals of four technical replicates from one of at least two independent experiments.



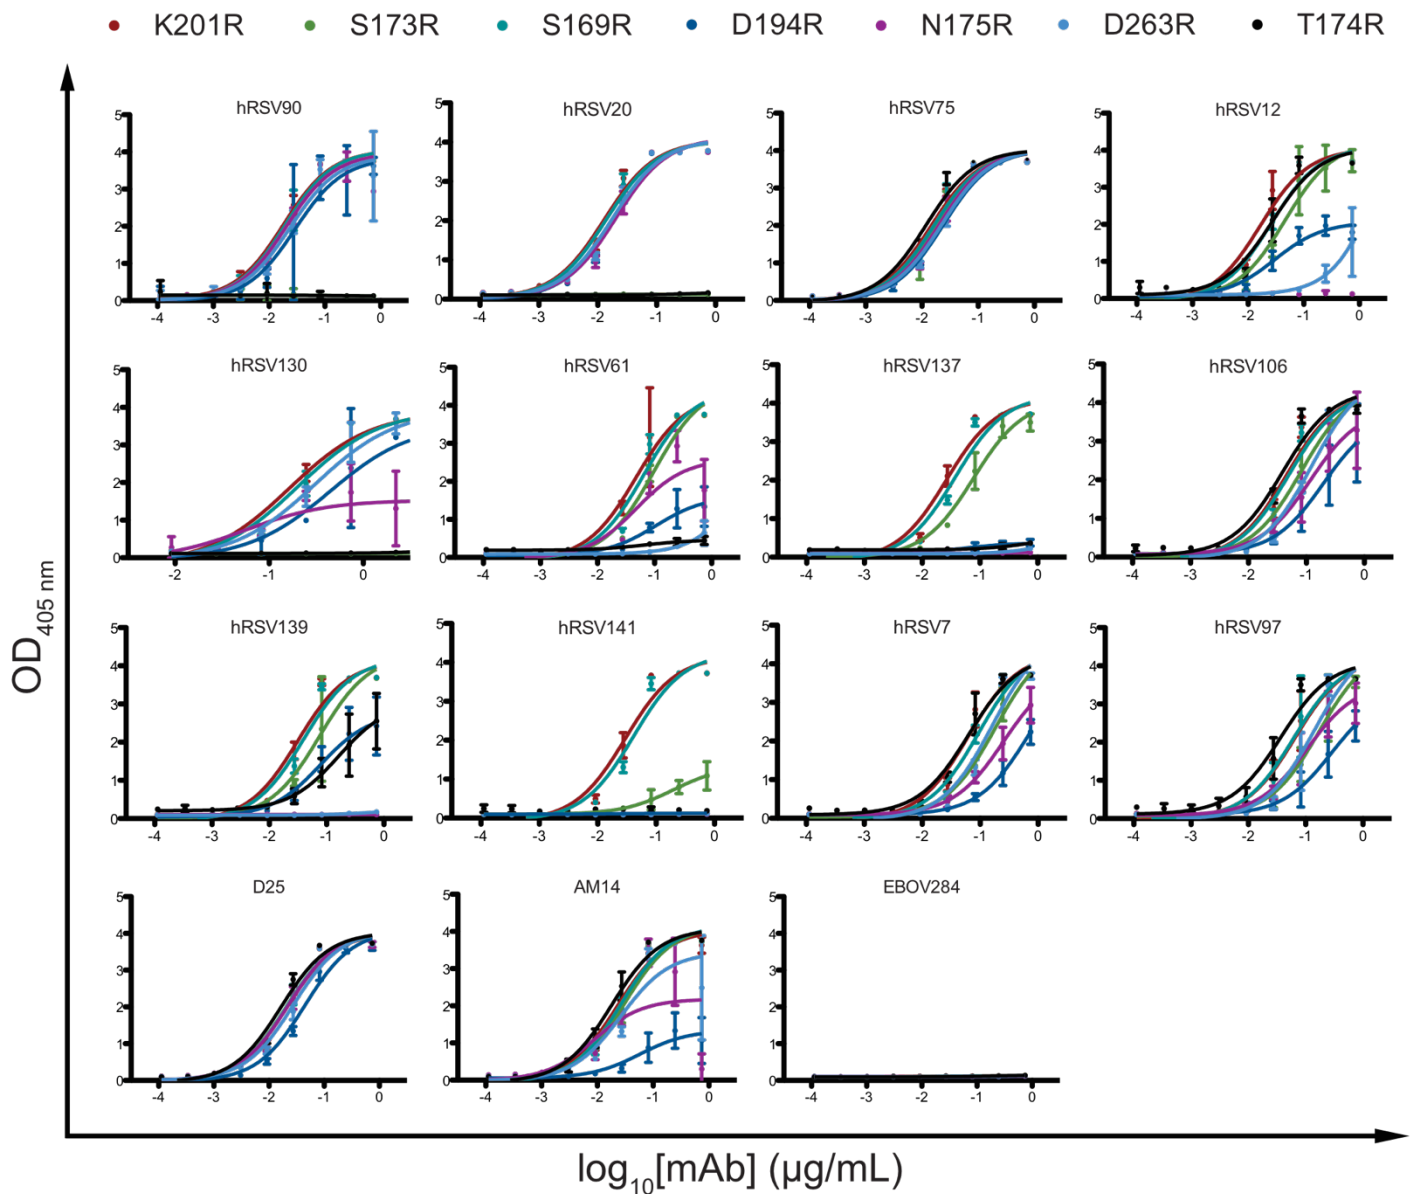

**Supplementary Figure 8. ELISA binding curves for RSV F SC-TM arginine mutations at the hRSV90 binding site.** Error bars indicate 95% confidence intervals of four technical replicates from one of at least two independent experiments.

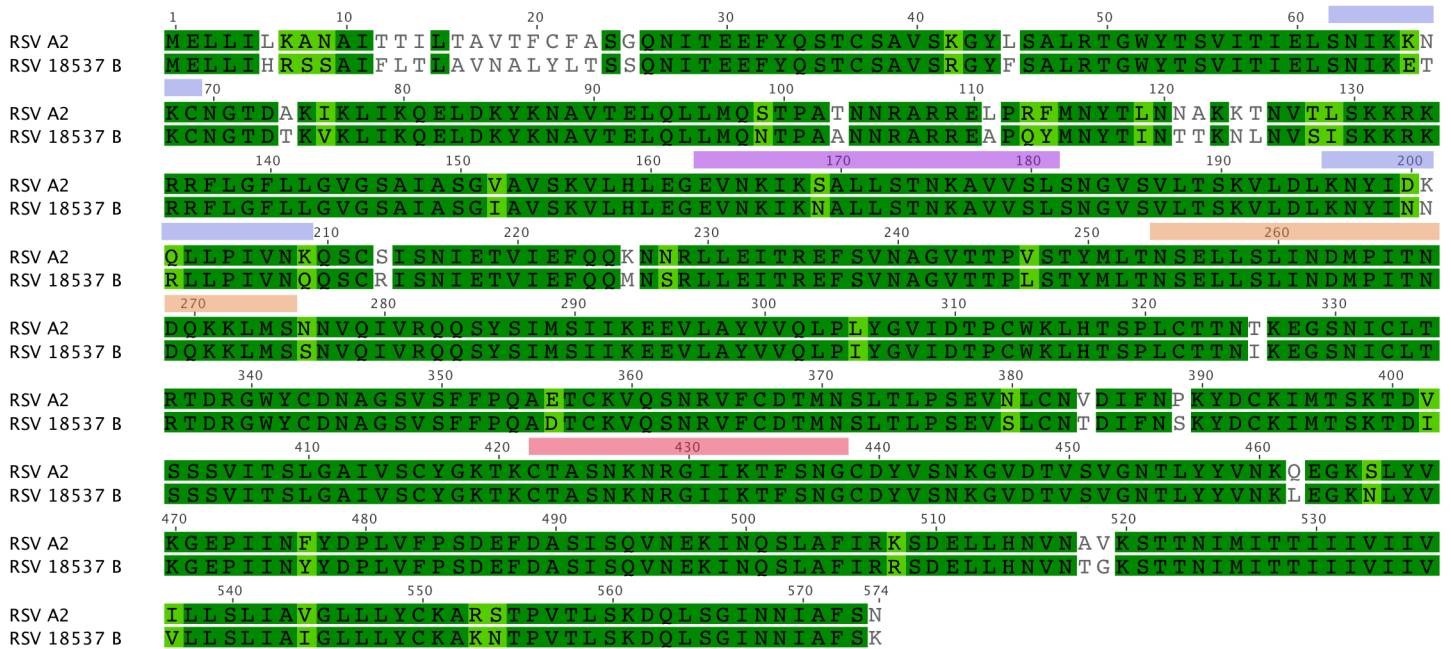

**Supplementary Figure 9. Alignment of RSV F proteins from subgroups A and B.** Amino acids in green are conserved among the two proteins, those in light green are semi-conserved, and those in white are not conserved. Antigenic sites are shaded above the corresponding sequences, with site Ø in blue, site VIII in magenta, site II in orange, and site IV in red.

**Supplementary Table 1. Data collection and refinement statistics**

| <b>Data collection*</b>                             | hRSV90+RSV A2 F SC-TM      |                        |
|-----------------------------------------------------|----------------------------|------------------------|
| Beamline                                            | LS-CAT 21-ID-G             | Anisotropy correction  |
| Number of crystals                                  | 1                          |                        |
| Space group                                         | R 3 2 H                    |                        |
| Cell dimensions                                     |                            |                        |
| <i>a</i> , <i>b</i> , <i>c</i> (Å)                  | 148.2, 148.2, 538.2        |                        |
| $\alpha$ , $\beta$ , $\gamma$ (°)                   | 90, 90, 120                |                        |
| Resolution (Å)                                      | 49.23 – 3.14 (3.26 – 3.14) | a= 3.6, b= 3.6, c= 3.1 |
| <i>R</i> <sub>merge</sub>                           | 0.385 (4.715)              | 0.266 (0.768)          |
| <i>I</i> / $\sigma I$                               | 5.2 (0.5)                  | 6.7 (2.2)              |
| Completeness (%)                                    | 99.9 (99.8)                | 75.2 (4.1)             |
| Redundancy                                          | 5.9 (5.9)                  | 4.4 (0.2)              |
| <b>Refinement</b>                                   |                            |                        |
| Resolution (Å)                                      |                            | 48.31 – 3.14           |
| No. unique reflections                              |                            | 30527 (272)            |
| <i>R</i> <sub>work</sub> / <i>R</i> <sub>free</sub> |                            | 0.2212 (0.2603)        |
| No. atoms                                           |                            |                        |
| Protein                                             |                            | 7077                   |
| <i>B</i> -factors                                   |                            |                        |
| Protein                                             |                            | 71.68                  |
| R.m.s. deviations                                   |                            |                        |
| Bond lengths (Å)                                    |                            | 0.012                  |
| Bond angles (°)                                     |                            | 1.41                   |
| Ramachandran statistics                             |                            |                        |
| Favored regions (%)                                 |                            | 95                     |
| Allowed regions (%)                                 |                            | 4.8                    |
| Outliers (%)                                        |                            | 0.22                   |

Values in parentheses are for the highest resolution data shell.
